# Supplementary material for: Impact of varying side chain structure on organic electrochemical transistor performance: a series of oligoethylene glycol-substituted polythiophenes
Source: Royal Society of Chemistry journal article supplement (doi:10.1039/d2ta00683a), 2022-01-01
Supplement: d2ta00683a1.pdf [file d2ta00683a1.pdf]

### Supplemental Information

Impact of Varying Side Chain Structure on Organic Electrochemical Transistor Performance: A Series of Oligoethylene Glycol-substituted Polythiophenes

*Shinya E. Chen,<sup>a</sup> Lucas Q. Flagg,<sup>b†</sup> Jonathan W. Onorato,<sup>c†</sup> Lee J. Richter,<sup>b</sup> Jiajie Guo,<sup>a</sup> Christine K. Luscombe,<sup>acde\*</sup> David S. Ginger<sup>ad\*</sup>*

<sup>a</sup> ~ Molecular Engineering and Science Institute, University of Washington, Seattle, WA 98195, United States.

<sup>b</sup> ~ Materials Science and Engineering Division, National Institute of Standards and Technology, Gaithersburg, Maryland 20899, United States.

<sup>c</sup> ~ Department of Materials Science and Engineering, University of Washington, Seattle, WA 98195, United States.

<sup>d</sup> ~ Department of Chemistry, University of Washington, Seattle, WA 98195, United States.

<sup>e</sup> ~ Current Address: pi-Conjugated Polymers Unit, Okinawa Institute of Science and Technology Graduate University, Onna-son, Okinawa, 904-0495, Japan.

<sup>†</sup> These two authors contributed equally to the work.

\* Corresponding Author. E-mail [christine.luscombe@oist.jp](mailto:christine.luscombe@oist.jp), [dginger@uw.edu](mailto:dginger@uw.edu)

## TABLE OF CONTENTS:

|     |                                                                                                                    |     |
|-----|--------------------------------------------------------------------------------------------------------------------|-----|
| 1.  | <b>Figure S1:</b> Determination of optical gap via Tauc plot                                                       | S3  |
| 2.  | <b>Figure S2:</b> OECT transfer curve of P3PAAT in $\text{KCl}_{(\text{aq})}$ and $\text{KPF}_6_{(\text{aq})}$     | S4  |
| 3.  | <b>Figure S3:</b> Determination of $\mu\text{C}^*$ of reduced-oxygen-content side chain polymers                   | S4  |
| 4.  | <b>Figure S4:</b> OECT output curves of reduced-oxygen-content side chain polymer                                  | S5  |
| 5.  | <b>Figure S5:</b> OECT output curves of P3MEEMT                                                                    | S5  |
| 6.  | <b>Figure S6:</b> Determination of $V_T$ of reduced-oxygen-content side chain polymers                             | S6  |
| 7.  | <b>Figure S7:</b> Determination of $V_T$ of polymers in $\text{KTFSI}_{(\text{aq})}$                               | S6  |
| 8.  | <b>Figure S8:</b> Determination of $V_T$ of P3MEEMT                                                                | S7  |
| 9.  | <b>Figure S9:</b> Example Nyquist plots of polymers in $\text{KCl}_{(\text{aq})}$ and $\text{KPF}_6_{(\text{aq})}$ | S8  |
| 10. | <b>Figure S10:</b> Example Bode plots of polymers in $\text{KCl}_{(\text{aq})}$ and $\text{KPF}_6_{(\text{aq})}$   | S9  |
| 11. | <b>Figure S11:</b> Example Nyquist and Bode plots of polymers in $\text{KTFSI}_{(\text{aq})}$                      | S10 |
| 12. | <b>Figure S12:</b> Charge accumulation in polymer films during CV scans                                            | S10 |
| 13. | <b>Figure S13:</b> Volumetric capacitance and charge injected in polymer films                                     | S11 |
| 14. | <b>Figure S14:</b> Water contact angle measurement images                                                          | S11 |
| 15. | <b>Figure S15:</b> OECT mobility of polymers in $\text{KCl}_{(\text{aq})}$ and $\text{KPF}_6_{(\text{aq})}$        | S11 |
| 16. | <b>Figure S16:</b> Spectroelectrochemistry of polymers in $\text{KCl}_{(\text{aq})}$                               | S12 |
| 17. | <b>Figure S17:</b> Spectroelectrochemistry of polymers in $\text{KPF}_6_{(\text{aq})}$                             | S13 |
| 18. | <b>Figure S18:</b> Comparison of polaron and $\pi$ - $\pi^*$ peak absorbance change in solutions                   | S14 |
| 19. | <b>Figure S19:</b> $\pi$ - $\pi^*$ peak absorbance change during doping and dedoping                               | S15 |
| 20. | <b>Figure S20:</b> AFM topography images of polymers                                                               | S16 |
| 21. | <b>Figure S21:</b> Roughness comparison of polymers                                                                | S16 |
| 22. | <b>Table S1:</b> $V_T$ and $C^*$ results of P3APPT and P3AAPT in $\text{KTFSI}_{(\text{aq})}$                      | S17 |
| 23. | <b>Table S2:</b> Polythiophene derivatives with isosbestic point in UV-Vis during doping                           | S17 |
| 24. | <b>Equation S1, S2 and S3:</b> Conversion of CPE to capacitor                                                      | S17 |
| 25. | <b>References</b>                                                                                                  | S18 |

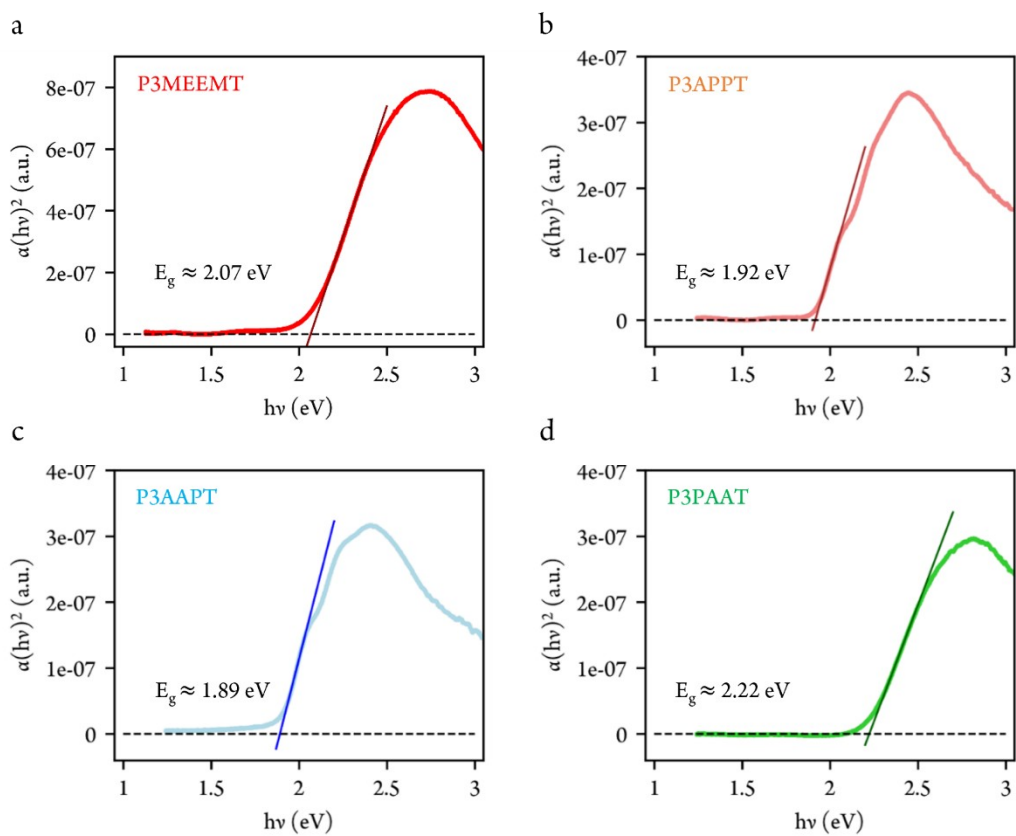

**Figure S1.** Determination of optical gap of polymers via Tauc plot. (a) P3MEEMT (b) P3APPT (c) P3AAPT (d) P3PAAT. Dash lines are guide for the eye.

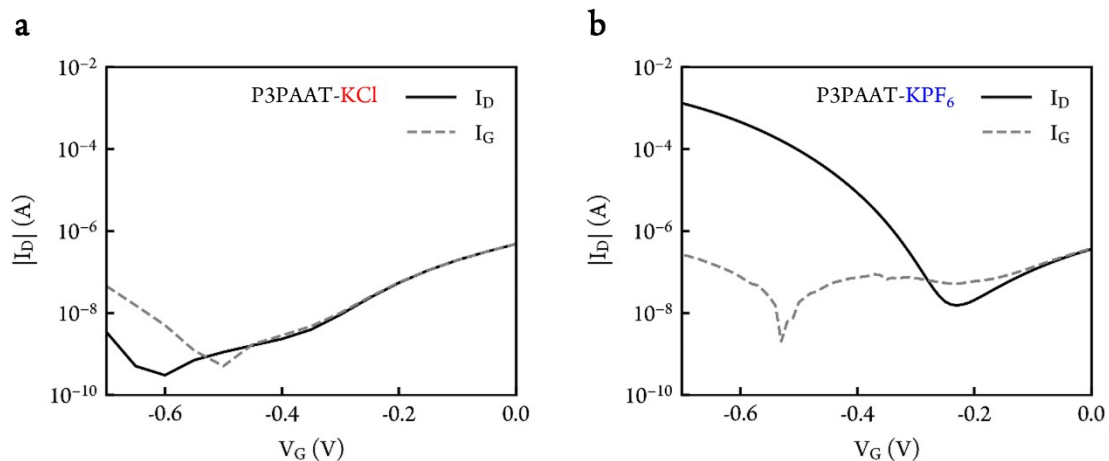

**Figure S2.** Organic electrochemical transistor, OECT, transfer curve of P3PAAT in (a) 100 mmol/L  $\text{KCl}_{(aq)}$  and (b) 100 mmol/L  $\text{KPF}_{6(aq)}$ . Channel width/length = 4000  $\mu\text{m}/10 \mu\text{m}$ . See main text for notation of polymer structure. Drain voltage,  $V_D = -0.6$  V. Drain current,  $I_D$ . Gate voltage,  $V_G$ . Gate current,  $I_G$ .

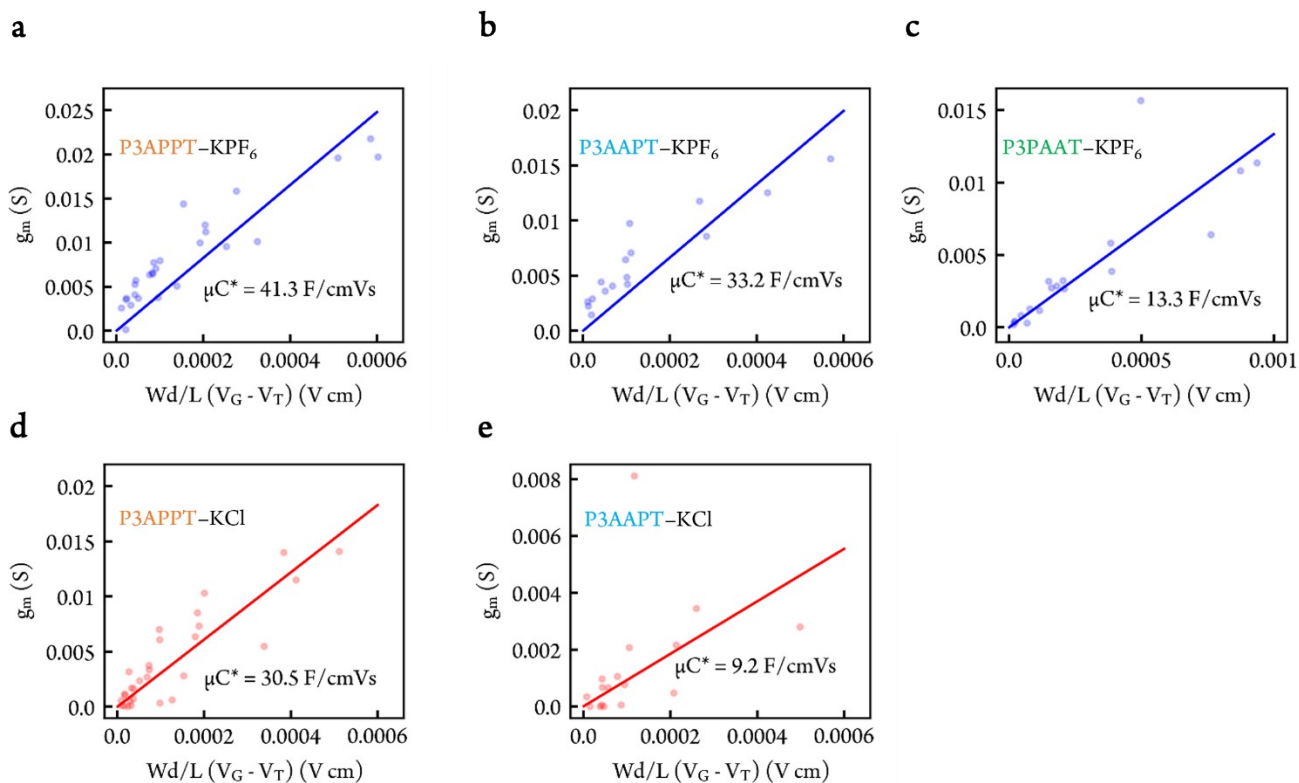

**Figure S3.** Determination of OECT figure of merit  $\mu C^*$  ( $\mu$  carrier mobility and  $C^*$  volumetric capacitance) of reduced-oxygen-content side chain polymers in 100 mmol/L  $\text{KPF}_{6(aq)}$  (a) P3APPT (b) P3AAPT (c) P3PAAT and in 100 mmol/L  $\text{KCl}_{(aq)}$  (d) P3APPT (e) P3AAPT. Each data point represents one transistor device. See main text for notation of polymer structure.

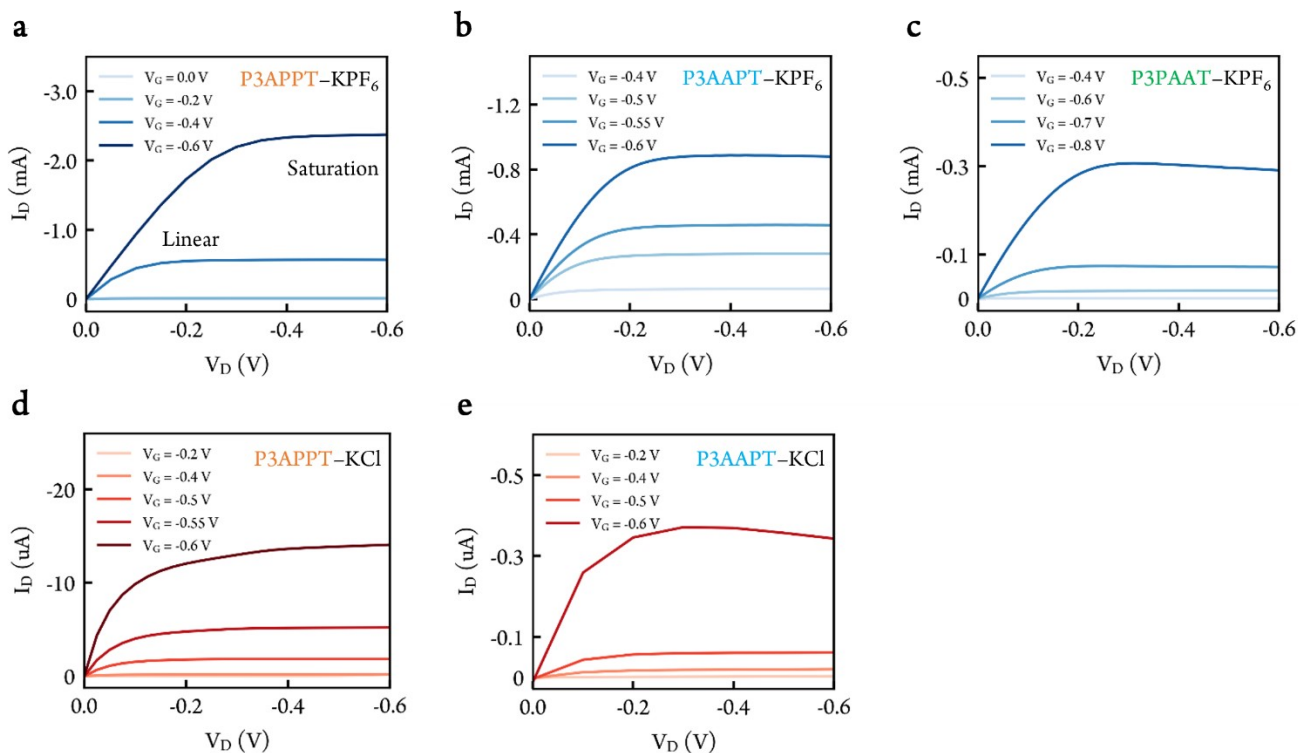

**Figure S4.** OECT output curves of reduced-oxygen-content side chain polymers in 100 mmol/L  $KPF_{6(aq)}$  of (a) P3APPT (b) P3AAPT (c) P3PAAT and in 100 mmol/L  $KCl_{(aq)}$  (d) P3APPT (e) P3AAPT. Channel width/length = 800  $\mu$ m/10  $\mu$ m.

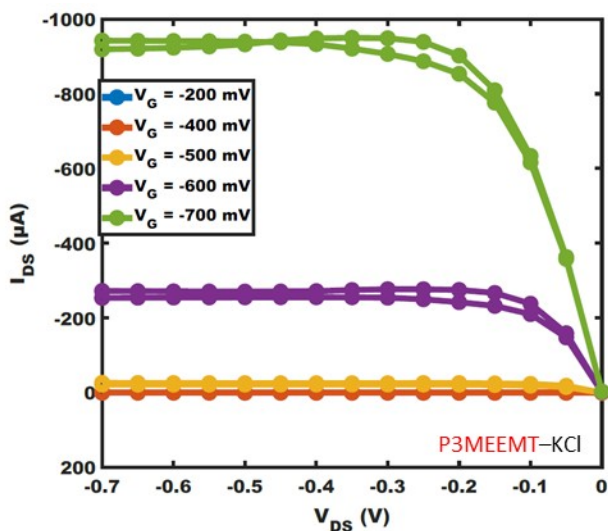

**Figure S5.** OECT output curve of poly(3-[[2-(2-methoxyethoxy)ethoxy]methyl]thiophene-2,5-diyl) (P3MEEMT) in 100 mmol/L  $KCl_{(aq)}$  obtained from Flagg et al.<sup>1</sup>

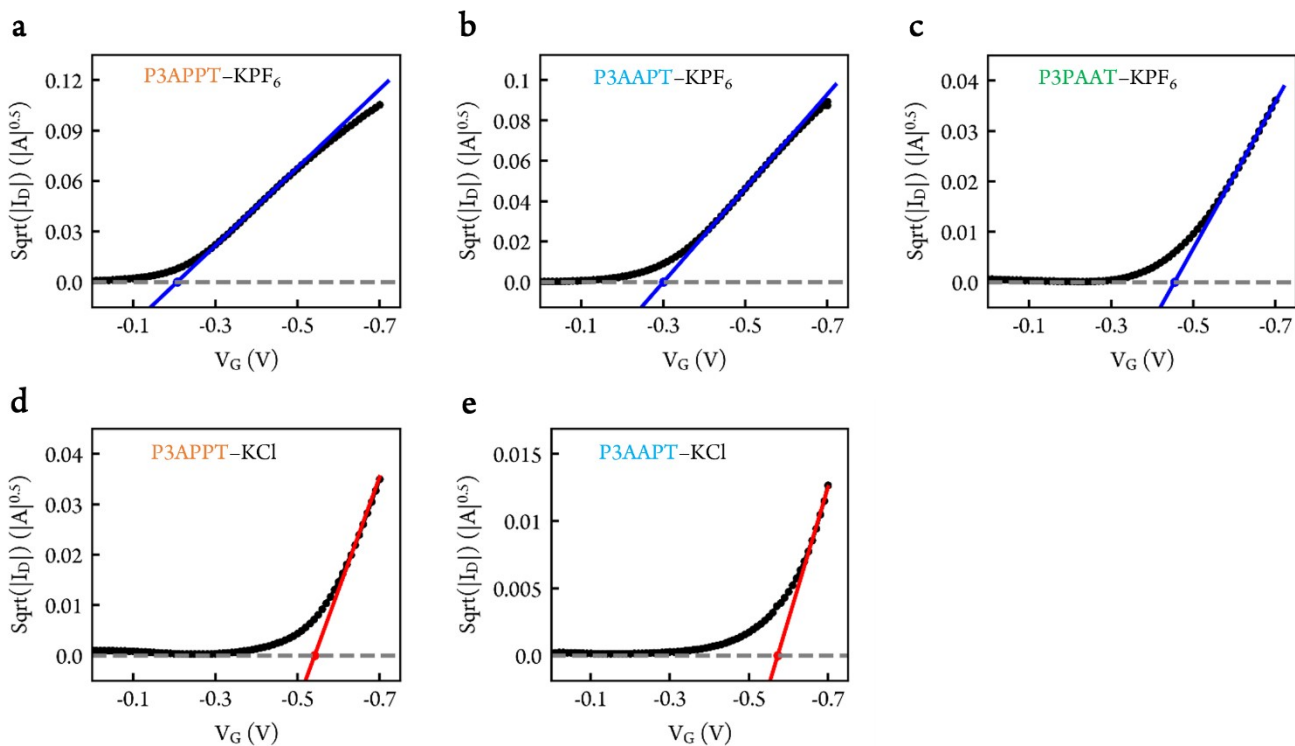

**Figure S6.** Determination of threshold voltage ( $V_T$ ) of reduced-oxygen-content side chain polymers in 100 mmol/L  $KPF_{6(aq)}$  (a) P3APPT (b) P3AAPT (c) P3PAAT and in 100 mmol/L  $KCl_{(aq)}$  (d) P3APPT (e) P3AAPT. Channel width/length = 4000  $\mu\text{m}$ /10  $\mu\text{m}$ . Grey dash lines are guide for the eye.

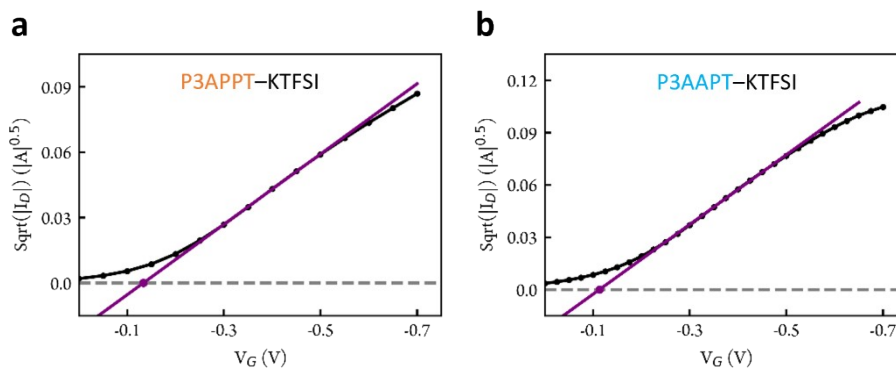

**Figure S7.** Determination of  $V_T$  of reduced-oxygen-content side chain polymers in 100 mmol/L  $KTFSl_{(aq)}$  (a) P3APPT (b) P3AAPT. Channel width/length = 2000  $\mu\text{m}$ /10  $\mu\text{m}$ . Grey dash lines are guide for the eye.

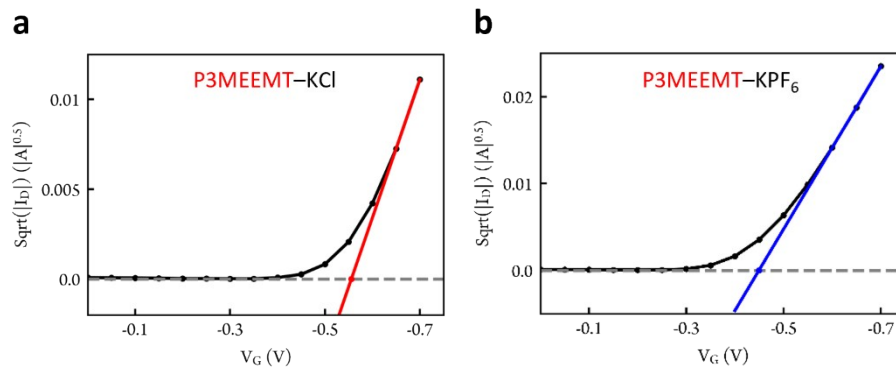

**Figure S8.** Determination of  $V_T$  of P3MEEMT in (a) 100 mmol/L  $\text{KCl}_{(aq)}$  and (b) 100 mmol/L  $\text{KPF}_6$  obtained from Flagg et al.<sup>1</sup> Grey dash lines are guide for the eye.

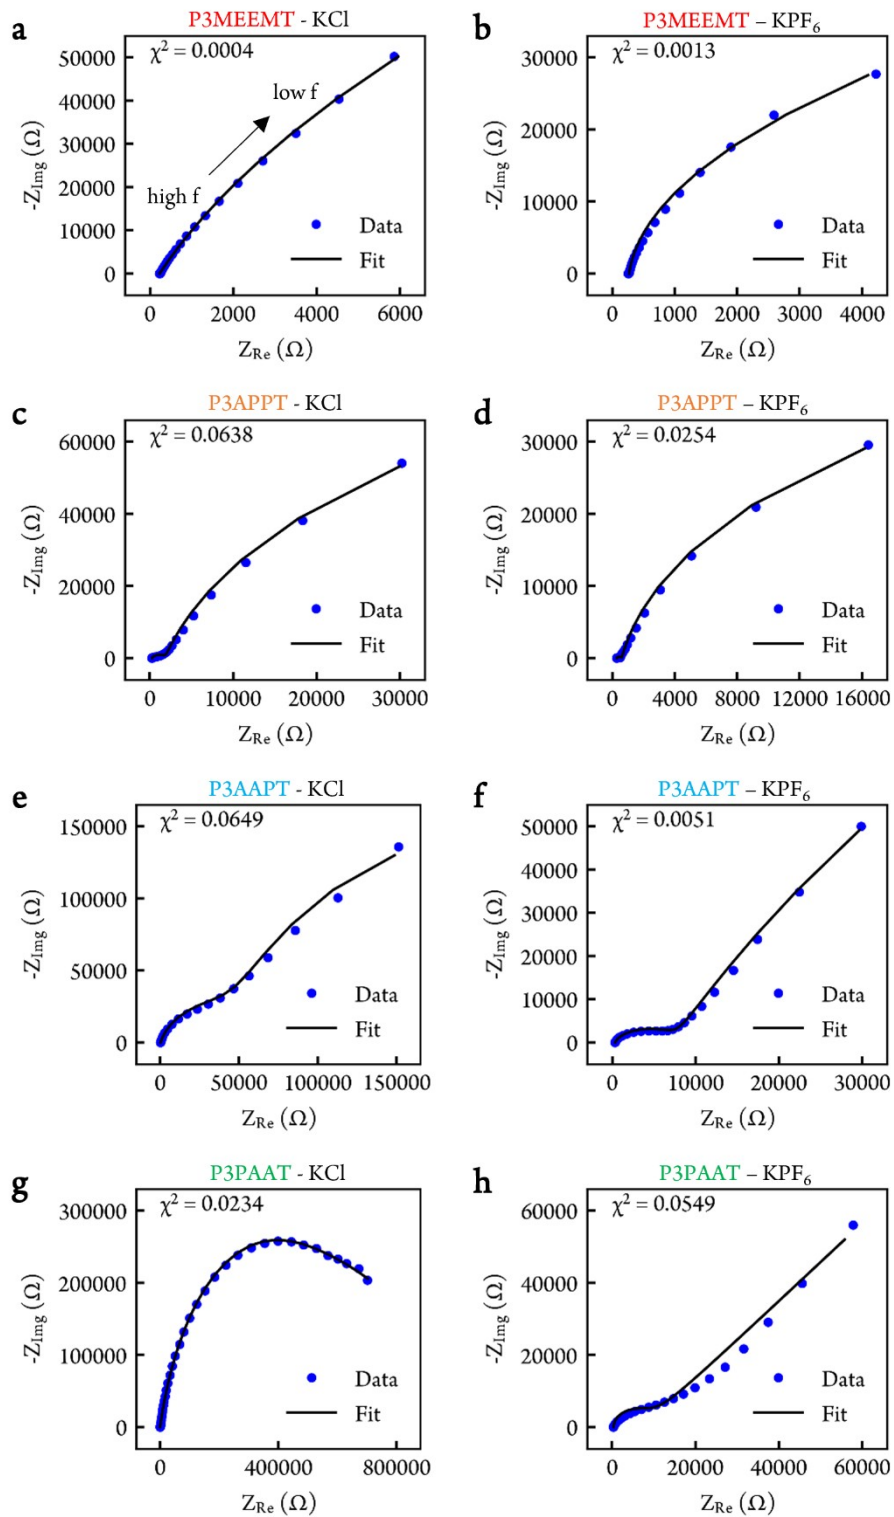

**Figure S9.** Example Nyquist plots of (a)(b)P3MEEMT (c)(d) P3APPT (e)(f) P3AAPT (g)(h) P3PAAT in 100 mmol/L  $KCl_{(aq)}$  (left) and 100 mmol/L  $KPF_6_{(aq)}$  (right), respectively.



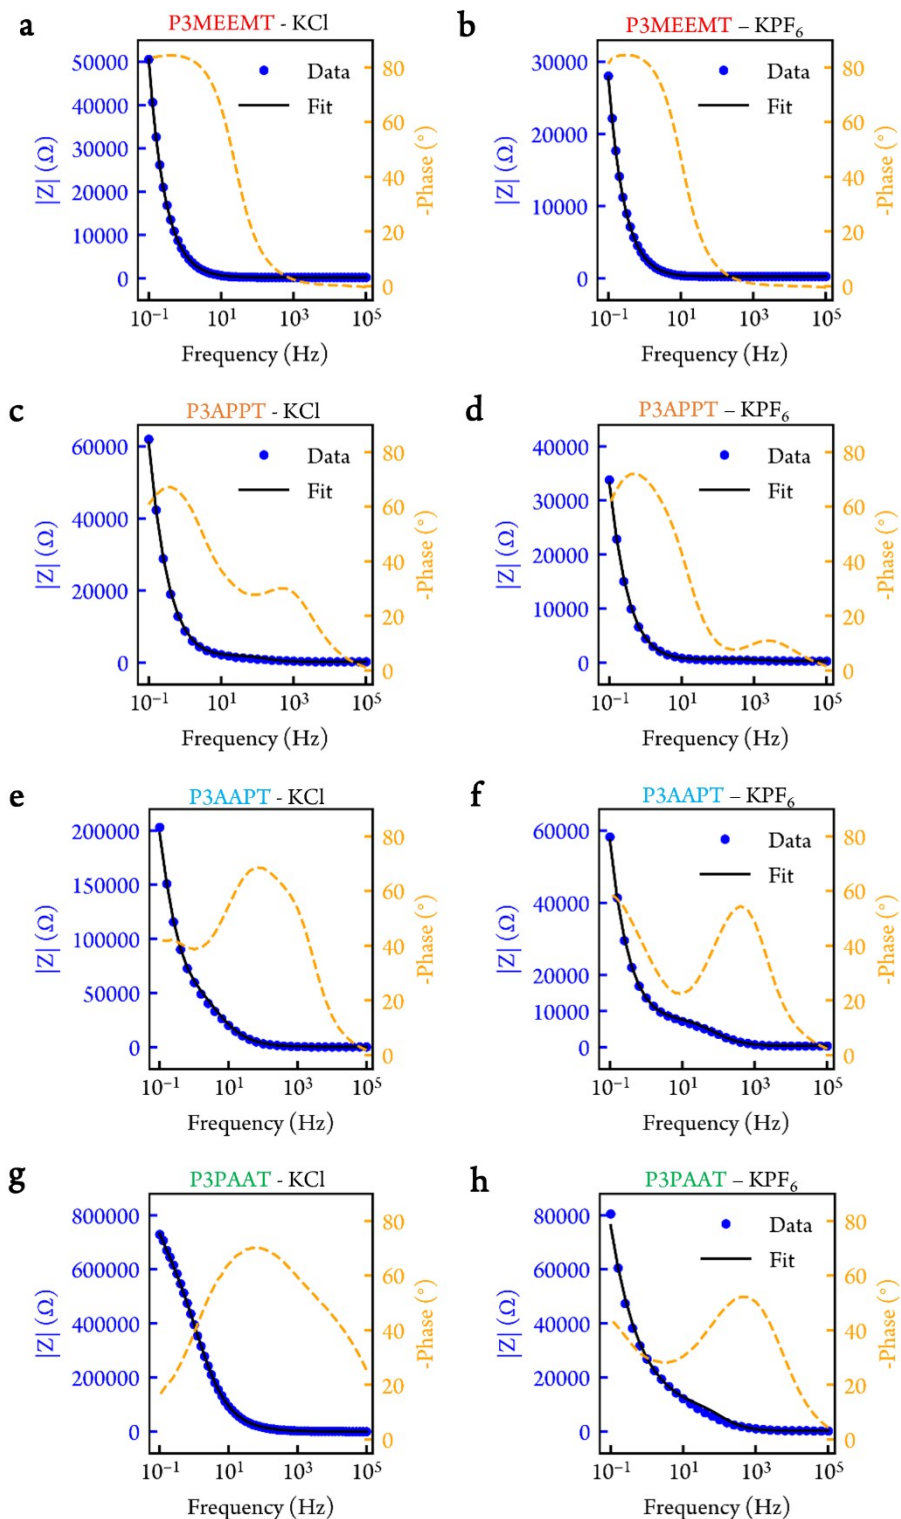

**Figure S10.** Example Bode plots of (a)(b)P3MEEMT (c)(d) P3APPT (e)(f) P3AAPT (g)(h) P3PAAT in 100 mmol/L  $KCl_{(aq)}$  (left) and 100 mmol/L  $KPF_{6(aq)}$  (right), respectively.

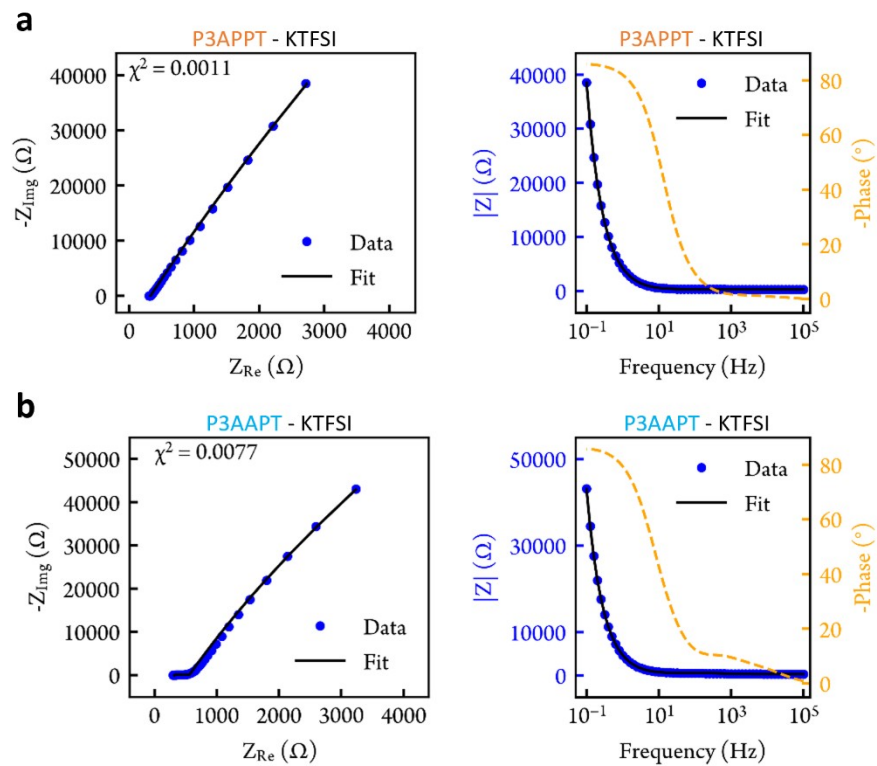

**Figure S11.** Example Nyquist plot (left) and Bode plot (right) of (a)P3APPT (b) P3AAPT in 100 mmol/L  $\text{KTFSI}_{(\text{aq})}$ .

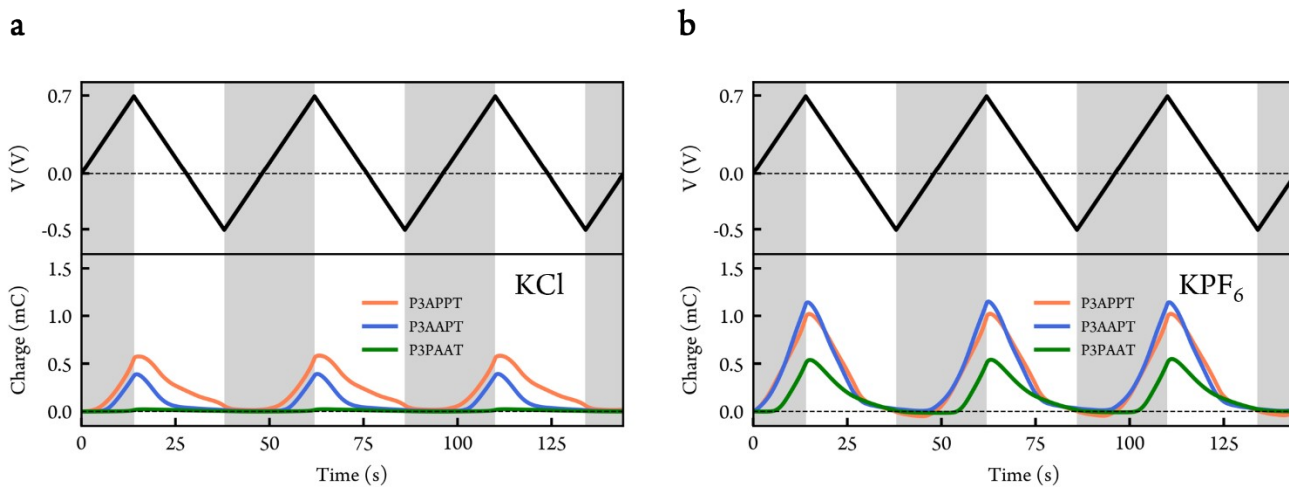

**Figure S12.** Charge injection in polymer films during cyclic voltammetry (CV) scans in (a) 100 mmol/L  $\text{KCl}_{(\text{aq})}$  and (b) 100 mmol/L  $\text{KPF}_6_{(\text{aq})}$ . Black dash lines are guide for the eye.

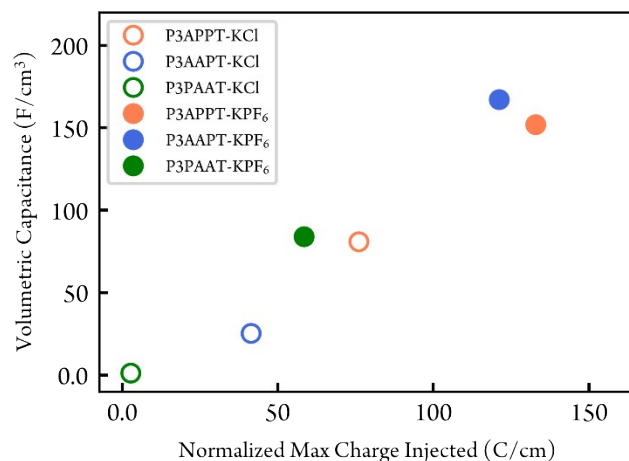

**Figure S13.** Volumetric capacitance (via EIS) and charge injected in polymer films (via coulometry). Charge injected in the film was normalized by polymer film thickness

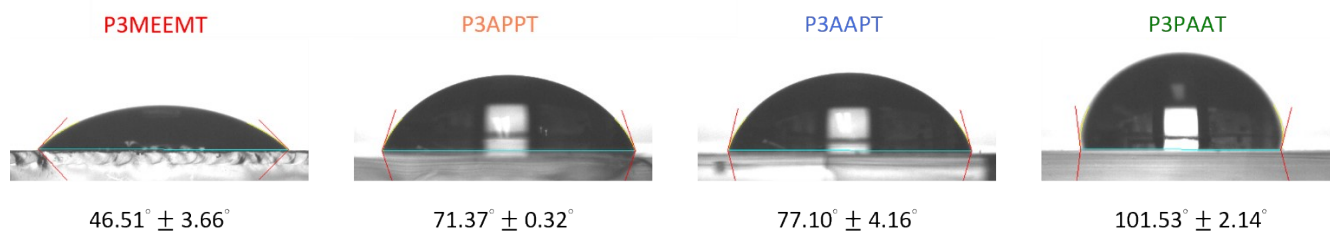

**Figure S14.** Water contact angle measurement images. Error bars represent standard error of the mean.

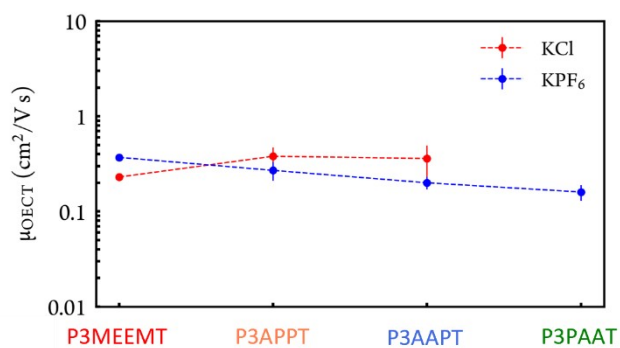

**Figure S15.** OECT mobility of polymers in 100 mmol/L KCl<sub>(aq)</sub> and 100 mmol/L KPF<sub>6(aq)</sub>. Dash lines are guide for the eye. OECT mobility was derived from dividing  $\mu C^*$  by  $C^*$  with error propagation. Error bar represents standard error of mean.

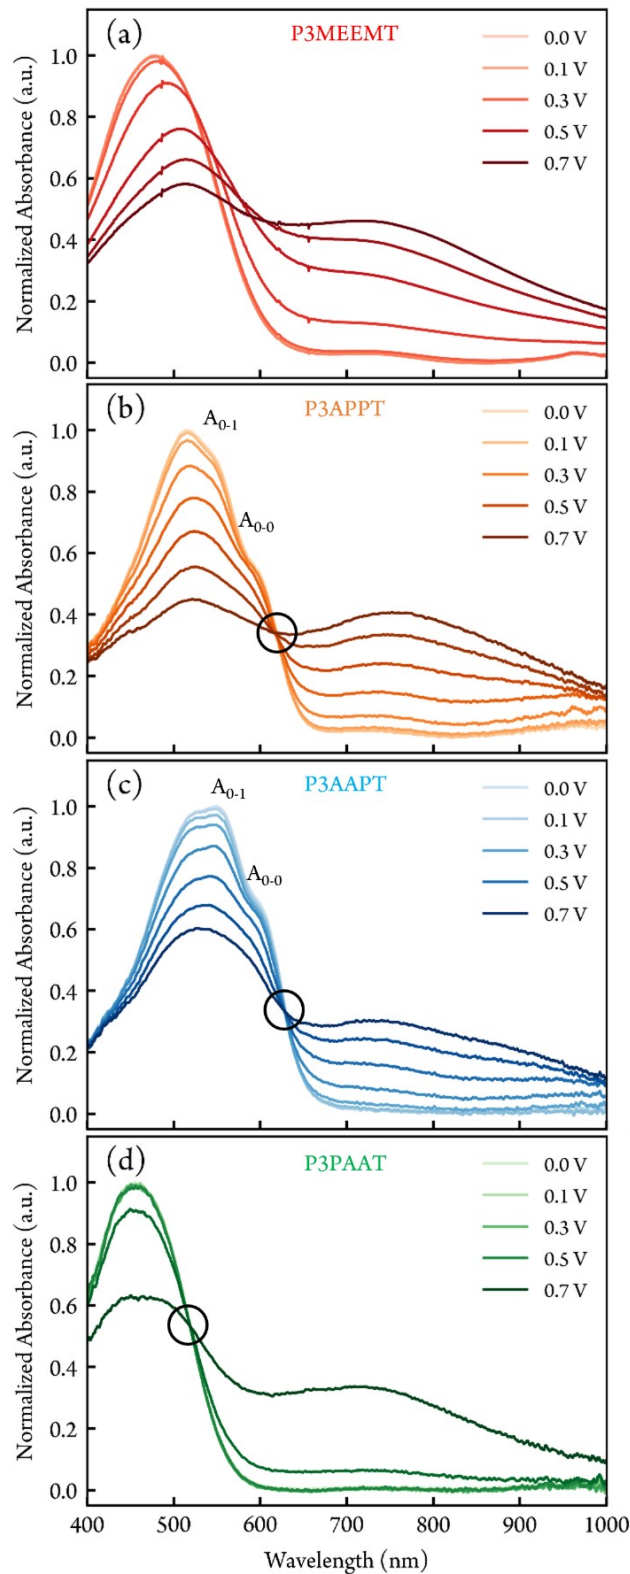

**Figure S16.** Spectroelectrochemistry of (a) P3MEEMT (b) P3APPT (c) P3AAPT (d) P3PAAT in 100 mmol/L  $KCl_{(aq)}$  electrolyte upon doping. Doping potential = 0.0 V, 0.1 V, 0.2 V, 0.3 V, 0.4 V, 0.5 V, 0.6 V, 0.7 V (vs Ag/AgCl). Black circle indicates the isosbestic point. Only P3APPT and P3AAPT show vibronic progression feature.

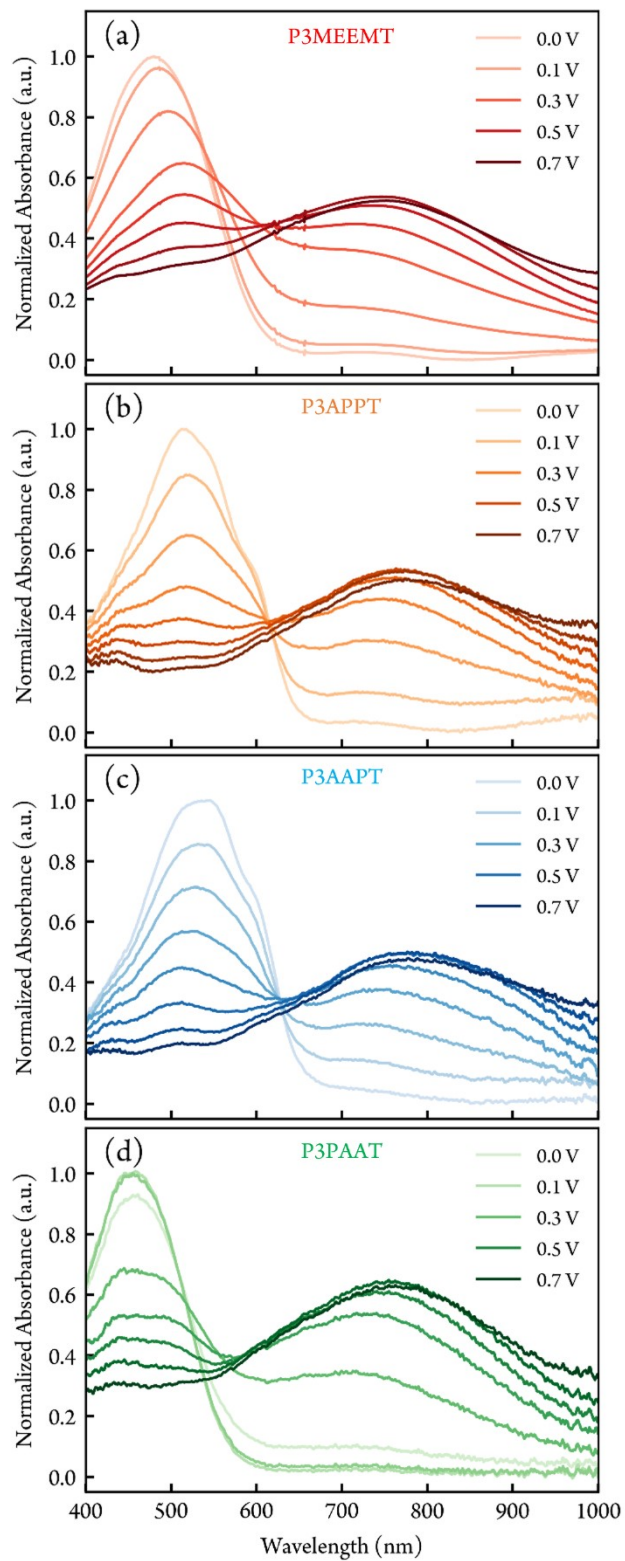

**Figure S17.** Spectroelectrochemistry of (a) P3MEEMT (b) P3APPT (c) P3AAPT (d) P3PAAT in 100 mmol/L  $KPF_6(aq)$  electrolyte upon doping. Doping potential = 0.0 V, 0.1 V, 0.2 V, 0.3 V, 0.4 V, 0.5 V, 0.6 V, 0.7 V (vs Ag/AgCl).

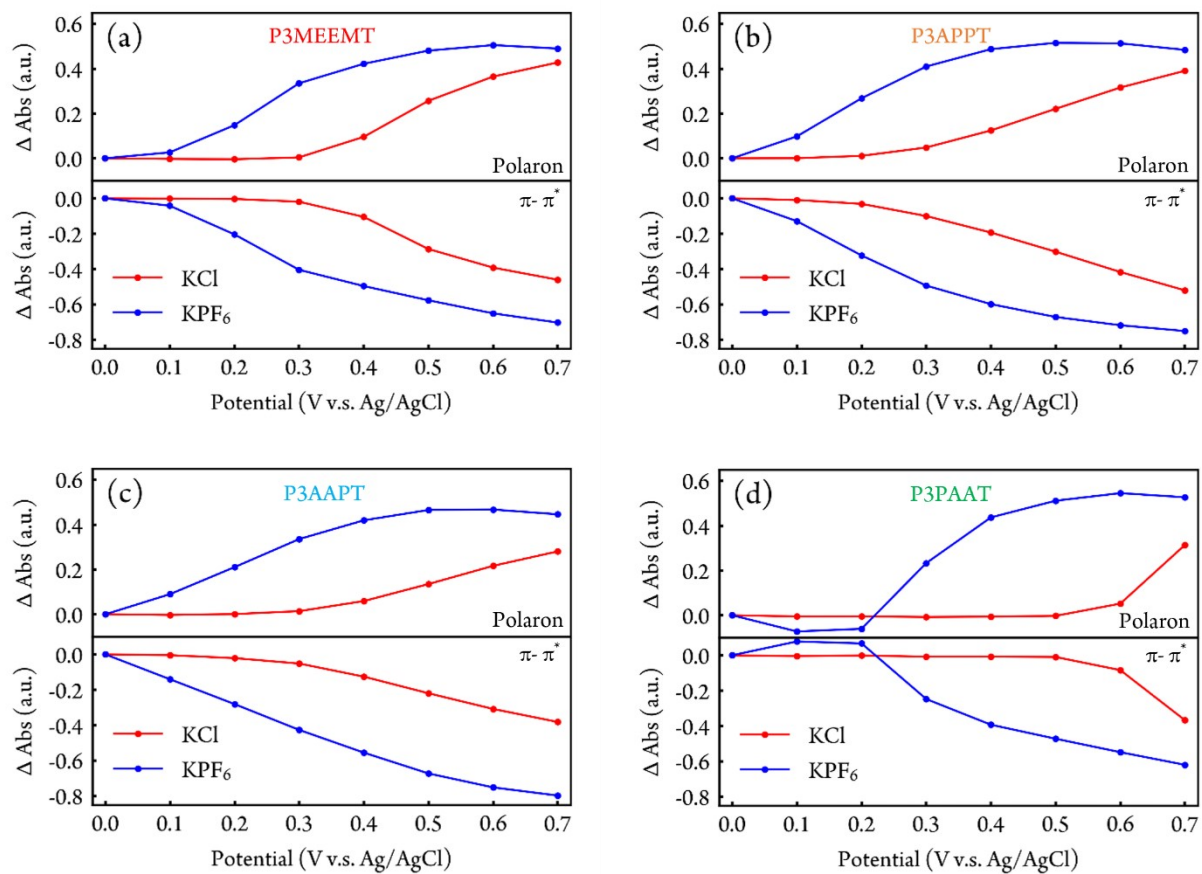

**Figure S18.** Comparison of polaron and  $\pi-\pi^*$  peak absorbance change upon doping in 100 mmol/L  $\text{KCl}_{(aq)}$  and  $\text{KPF}_{6(aq)}$  (a) P3MEEMT (b) P3APPT (c) P3AAPT and (d) P3PAAT.



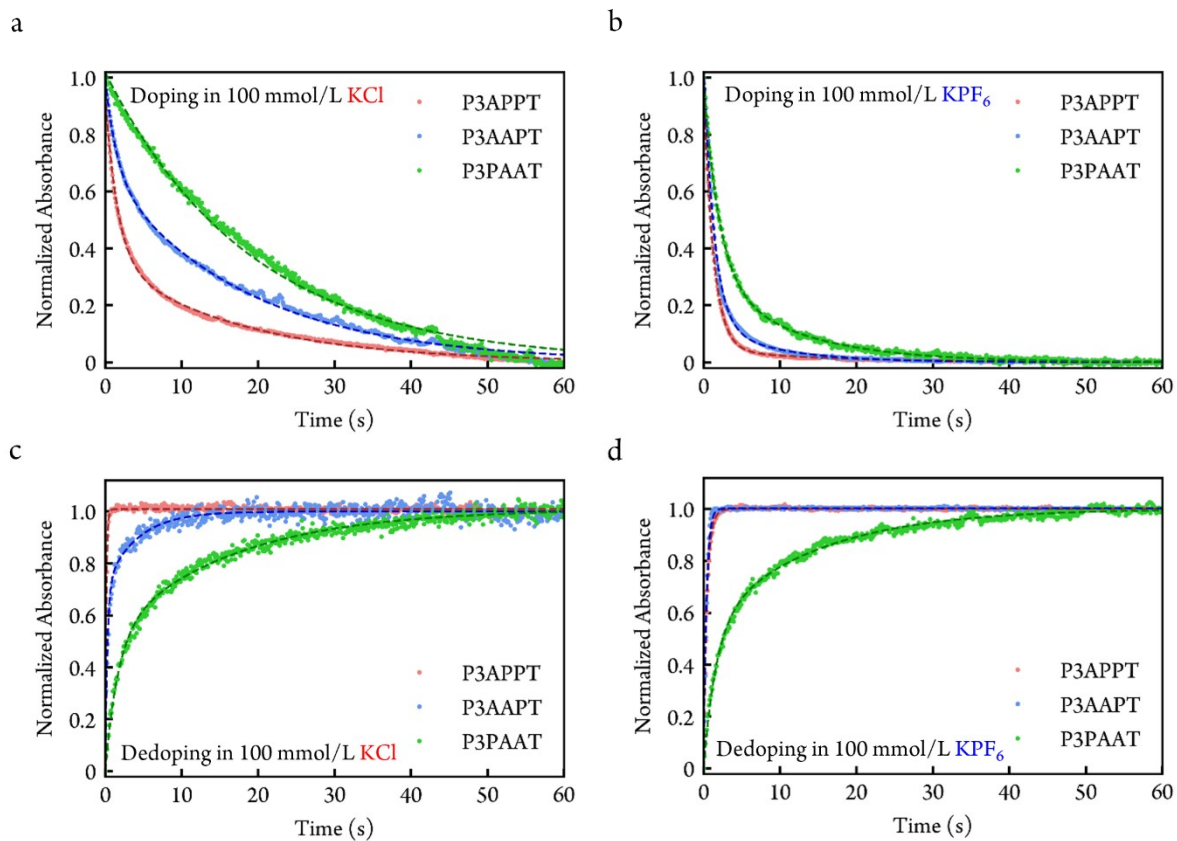

**Figure S19.**  $\pi$ - $\pi^*$  peak absorbance change over time during doping in (a)  $\text{KCl}_{(aq)}$  (b)  $\text{KPF}_{6(aq)}$  and dedoping in (c)  $\text{KCl}_{(aq)}$  (d)  $\text{KPF}_{6(aq)}$ . Dash lines represent the fitting results.

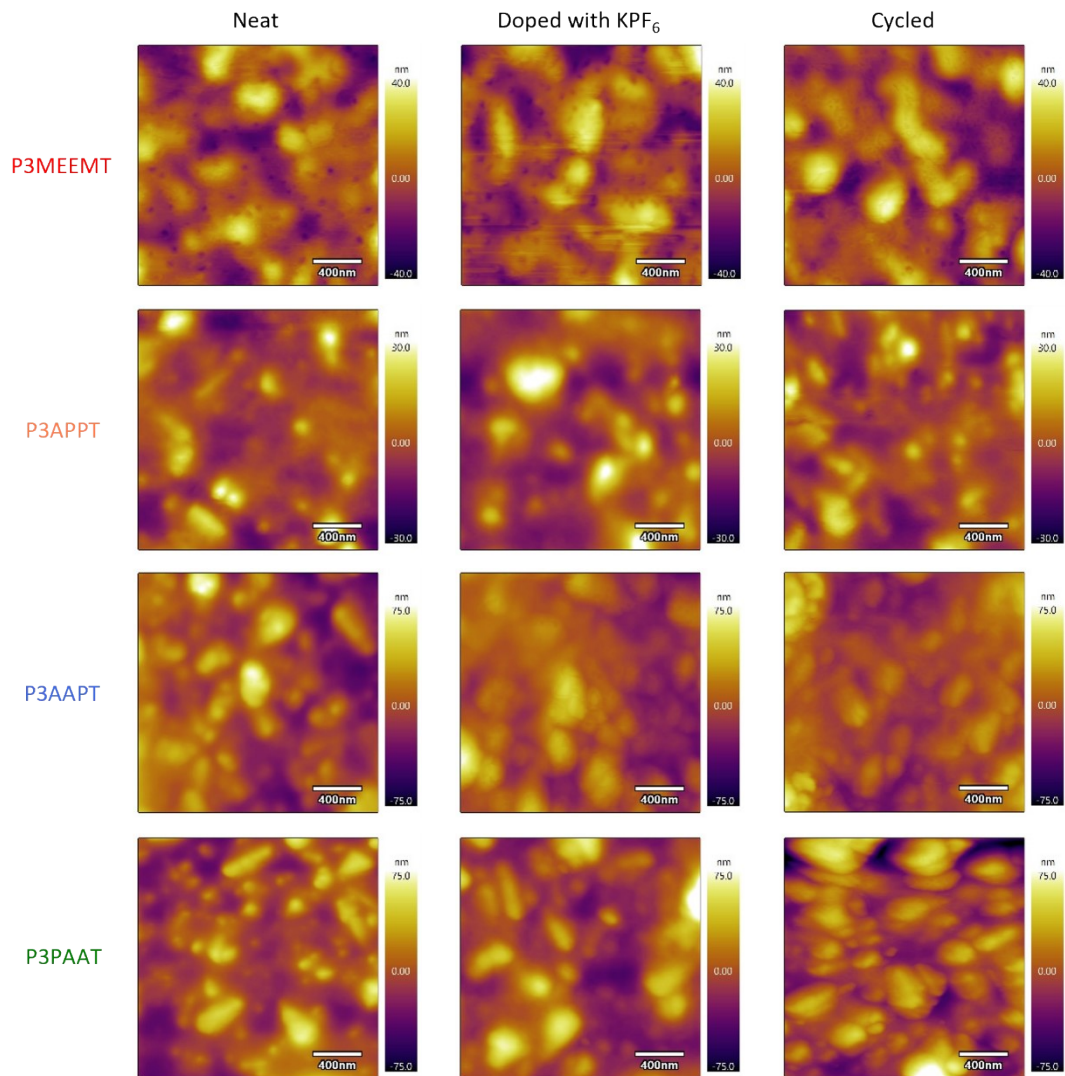

**Figure S20.** Atomic force microscopy (AFM) topography images of four polymers in three different states: neat, doped and after three cycles of doping and dedoping. Polymer films were deposited on fluorine-doped tin oxide (FTO) glass substrate.

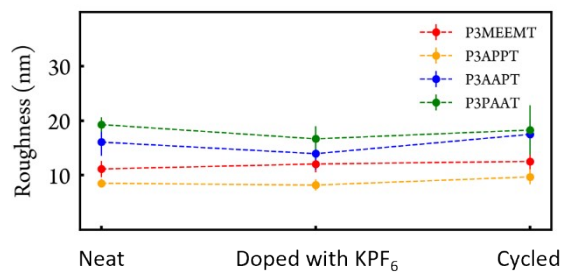

**Figure S21.** Roughness of neat polymer films, doped polymer films (with KPF<sub>6</sub>), and polymer films doped and dedoped for three cycles with KPF<sub>6</sub>. At least four different regions of the film were scanned. Error bars represent standard deviation.



Table S1.  $V_T$  and  $C^*$  results of P3APPT and P3AAPT in 100 mmol/L KTFSI<sub>(aq)</sub>

|        | $C^*$<br>(F/cm <sup>3</sup> ) | $V_T$<br>(V) |
|--------|-------------------------------|--------------|
| P3APPT | 143.2 ± 9.4                   | -0.14 ± 0.01 |
| P3AAPT | 107.5 ± 6.5                   | -0.11 ± 0.02 |

Table S2. Polythiophene derivatives with isosbestic point observed in spectroelectrochemistry

| Polymer                              | Electrolyte             | References |
|--------------------------------------|-------------------------|------------|
| P3HHT                                | KCl                     | 2          |
| P3MEET                               | NaCl                    | 3          |
| PTHS-TMA+ <i>-co</i> -P3HT 70:30 mol | NaCl                    | 4          |
| PTHS-TMA+ <i>-co</i> -P3HT 51:49 mol | NaCl                    | 4          |
| PTHS-TMA+ <i>-co</i> -P3HT 23:77 mol | NaCl                    | 4          |
| P3HT                                 | Polymetric Ionic Liquid | 5          |
| P3APPT                               | KCl                     | This work  |
| P3AAPT                               | KCl                     | This work  |
| P3PAAT                               | KCl                     | This work  |

### Conversion of CPE to Capacitor.

Eq S1 shows the impedance form of a constant phase element (CPE).  $\omega$  is the angular frequency.  $Y_0$  and  $n$  are the characteristic parameters of the CPE. A CPE is an imperfect capacitor with  $n$  value between 0 and 1. A CPE with  $n$  equals to 1 represents an ideal capacitor. Eq S2 shows the impedance form of a capacitor. We applied Eq S3 to convert  $Y_0$  to an equivalent capacitor.  $\omega_{max}$  is the frequency where the imaginary part of impedance has its maximum.<sup>6,7</sup>

$$Z_{CPE} = \frac{1}{Y_0 (i\omega)^n} \quad (\text{Eq S1})$$

$$Z_C = \frac{1}{C (i\omega)^1} \quad (\text{Eq S2})$$

$$C = Y_0 (\omega_{max})^{n-1} \quad (\text{Eq S3})$$

## References

- 1 L. Q. Flagg, C. G. Bischak, J. W. Onorato, R. B. Rashid, C. K. Luscombe and D. S. Ginger, *J. Am. Chem. Soc.*, 2019, **141**, 4345–4354.
- 2 T. Nicolini, J. Surgailis, A. Savva, A. D. Scaccabarozzi, R. Nakar, D. Thuau, G. Wantz, L. J. Richter, O. Dautel, G. Hadziioannou and N. Stingelin, *Adv. Mater.*, 2020, **33**, 2005723.
- 3 P. Schmode, A. Savva, R. Kahl, D. Ohayon, F. Meichsner, O. Dolynchuk, T. Thurn-Albrecht, S. Inal and M. Thelakkat, *ACS Appl. Mater. Interfaces*, 2020, **12**, 13029–13039.
- 4 P. Schmode, D. Ohayon, P. M. Reichstein, A. Savva, S. Inal and M. Thelakkat, *Chem. Mater.*, 2019, **31**, 5286–5295.
- 5 E. M. Thomas, M. A. Brady, H. Nakayama, B. C. Popere, R. A. Segalman and M. L. Chabinyk, *Adv. Funct. Mater.*, 2018, **28**, 1803687.
- 6 C. H. Hsu and F. Mansfeld, *Corrosion*, 2001, **57**, 747–748.
- 7 B. Y. Chang, *J. Electrochem. Sci. Technol.*, 2020, **11**, 318–321.
